# Supplementary material for: Molecular and Clinical Characterization of CNGA3 and CNGB3 Genes in Brazilian Patients Affected with Achromatopsia
Source: MDPI journal article supplement (doi:10.3390/genes14061296), 2023-06-20
Supplement: s1 [file s1]

Supplemental Table S1. Genes included in the NGS panels used.

| IRD NGS panel (224 IRD-associated genes)                                                                                                                                                                                                                                                                                                                                                                                                                                                                                                                                                                                                                                                                                                                                                                                                                                            | IRD NGS panel (330 IRD-associated genes)                                                                                                                                                                                                                                                                                                                                                                                                                                                                                                                                                                                                                                                                                                                                                                                                                                                                                                                                                                                                  |
|-------------------------------------------------------------------------------------------------------------------------------------------------------------------------------------------------------------------------------------------------------------------------------------------------------------------------------------------------------------------------------------------------------------------------------------------------------------------------------------------------------------------------------------------------------------------------------------------------------------------------------------------------------------------------------------------------------------------------------------------------------------------------------------------------------------------------------------------------------------------------------------|-------------------------------------------------------------------------------------------------------------------------------------------------------------------------------------------------------------------------------------------------------------------------------------------------------------------------------------------------------------------------------------------------------------------------------------------------------------------------------------------------------------------------------------------------------------------------------------------------------------------------------------------------------------------------------------------------------------------------------------------------------------------------------------------------------------------------------------------------------------------------------------------------------------------------------------------------------------------------------------------------------------------------------------------|
| ABCA4, ABCB5, ABCC6, ABHD12, ACO2,<br>ADAM9, ADAMTS9, ADGRV1, AFG3L2,<br>AGBL5, AHI1, AHR, AIPL1, ALMS1,<br>ALPK1, AMACR, ARFGAP2, ARHGEF18,<br>ARL13B, ARL2BP, ARL3, ARL6, ARMC9,<br>ARSG, ASRGL1, ATF6, B9D1, B9D2,<br>BBIP1, BBS1, BBS10, BBS12, BBS2, BBS4,<br>BBS5, BBS7, BBS9, BEST1, C1QTNF5, CA4,<br>CABP4, CACNA1F, CACNA2D4, CASK,<br>CC2D2A, CDH23, CDH3, CDHR1,<br>CEP120, CEP162, CEP164, CEP250,<br>CEP290, CEP41, CEP78, CERKL, CFAP20,<br>CFAP410, CFAP418, CFH, CHM, CISD2,<br>CLCC1, CLEC3B, CLN3, CLN5, CLN6,<br>CLN8, CLRN1, CNGA1, CNGA3, CNGB1,<br>CNGB3, CNNM4, COL18A1, COL9A3,<br>CPLANE1, CRB1, CROCC, CRX, CSPP1,<br>CTNNA1, CTNNB1, CTSD, CTSF,<br>CWC27, CYP4V2, DHDDS, DHX38,<br>DNAJC17, DNAJC5, DNM1L, DRAM2,<br>DYNC2H1, EFEMP1, ELOVL4, ESPN,<br>EXOSC2, EYS, FAM161A, FLVCR1,<br>FRMD7, FSCN2, FZD4, GDF6, GJB2,<br>GNAT1, GNAT2, GNPTG, GPR143, | ABCA4, ABCC6, ABHD12, ACBD5, ACO2, ADAM9,<br>ADAMTS18, ADAMTSL4, ADGRA3, ADGRV1,<br>ADIPOR1, AGBL5, AHI1, AHR, AIPL1, ALMS1,<br>ARHGEF18, ARL13B, ARL2BP, ARL3, ARL6,<br>ARMC9, ARSG, ASRGL1, ATF6, ATOH7, B9D1,<br>BBIP1, BBS1, BBS10, BBS12, BBS2, BBS4, BBS5,<br>BBS7, BBS9, BEST1, C10ORF11, C12ORF65,<br>C1QTNF5, C8ORF37, CA4, CABP4, CACNA1F,<br>CACNA2D4, CAPN5, CC2D2A, CCT2, CDH23,<br>CDH3, CDHR1, CEP164, CEP19, CEP250,<br>CEP290, CEP41, CEP78, CEP83, CERKL,<br>CFAP410, CHM, CIB2, CISD2, CLCC1,<br>CLN2 (TPP1), CLN3, CLN5, CLN6, CLN8, CLRN1,<br>CLUAP1, CNGA1, CNGA3, CNGB1, CNGB3,<br>CNNM4, COL11A1, COL11A2, COL18A1, COL2A1,<br>COL9A1, COL9A2, COL9A3, CPLANE1, CRB1,<br>CRX, CSPP1, CTNNA1, CTSD, CWC27, CYP4V2,<br>DHDDS, DHX32, DHX38, DNAJC17, DRAM2,<br>DSCAML1, DTHD1, EFEMP1, ELOVL4, EMC1,<br>ERCC6, EXOSC2, EYS, FAM161A, FBLN5,<br>FLVCR1, FRMD7, FSCN2, FZD4, GDF6, GNAT1,<br>GNAT2, GNB3, GNPTG, GNS, GPR143, GPR179,<br>GPR45, GRM6, GRN, GUCA1A, GUCA1B,<br>GUCY2D, HAR5, HGSNAT, HK1, HMCN1, HMX1, |

|                                                                                                                                                                                                                                                                                                                                                                                                                                                                                                                                                                                                                                                                                                                                                                                                                                                                                                                                                    |                                                                                                                                                                                                                                                                                                                                                                                                                                                                                                                                                                                                                                                                                                                                                                                                                                                                                                                                                                                                                                                                                                                          |
|----------------------------------------------------------------------------------------------------------------------------------------------------------------------------------------------------------------------------------------------------------------------------------------------------------------------------------------------------------------------------------------------------------------------------------------------------------------------------------------------------------------------------------------------------------------------------------------------------------------------------------------------------------------------------------------------------------------------------------------------------------------------------------------------------------------------------------------------------------------------------------------------------------------------------------------------------|--------------------------------------------------------------------------------------------------------------------------------------------------------------------------------------------------------------------------------------------------------------------------------------------------------------------------------------------------------------------------------------------------------------------------------------------------------------------------------------------------------------------------------------------------------------------------------------------------------------------------------------------------------------------------------------------------------------------------------------------------------------------------------------------------------------------------------------------------------------------------------------------------------------------------------------------------------------------------------------------------------------------------------------------------------------------------------------------------------------------------|
| GPR179, GRK1, GRM6, GRN, GUCA1A, GUCA1B, GUCY2D, HGSNAT, HK1, HKDC1, HMCN1, HMX1, IDH3A, IDH3B, IFT140, IFT172, IFT27, IFT43, IFT74, IFT88, IGFBP7, IMPDH1, IMPG1, IMPG2, INPP5E, IQCB1, IRX5, ITM2B, KCNJ13, KCNV2, KCTD7, KIAA0586, KIAA0753, KIAA1549, KIF3B, KIF7, KIZ, KLHL7, LAMA1, LCA5, LRAT, LRIT3, LRP5, LZTFL1, MAK, MAPKAPK3, MERTK, MFN2, MFRP, MFSD8, MIR204, MKKS, MKS1, MPDZ, MTPAP, MTTP, MYO7A, NAGLU, NBAS, NDP, NEK2, NEUROD1, NMNAT1, NPHP1, NPHP3, NPHP4, NR2E3, NR2F1, NRL, NYX, OAT, OCA2, OFD1, OPA1, OPA3, OPN1SW, OR2W3, OTX2, P3H2, PAX2, PAX6, PCARE, PCDH15, PCYT1A, PDE6A, PDE6B, PDE6C, PDE6D, PDE6G, PDE6H, PDZD7, PEX1, PEX10, PEX11B, PEX12, PEX13, PEX14, PEX16, PEX19, PEX2, PEX26, PEX3, PEX5, PEX6, PEX7, PHYH, PIBF1, PITPNM3, PLK4, PNPLA6, POC1B, POC5, PPP2R3C, PPP2R5E, PPT1, PRCD, PROM1, PRPF3, PRPF31, PRPF4, PRPF6, PRPF8, PRPH2, PRPS1, PYGM, RAB28, RAX2, RBP3, RBP4, RCBTB1, RD3, RDH11, RDH12, | IDH3A, IDH3B, IFT140, IFT172, IFT27, IFT43, IFT74, IFT80, IFT81, IFT88, IMPDH1, IMPG1, IMPG2, INPP5E, INVS, IQCB1, ITM2B, JAG1, KCNJ13, KCNV2, KIAA0586, KIAA1549, KIF11, KIF7, KIZ, KLHL7, LCA5, LRAT, LRIT3, LRP2, LRP5, LYST, LZTFL1, MAK, MAPKAPK3, MERTK, MFN2, MFRP, MFSD8, MIR204, MKKS, MKS1, MPDZ, MTPAP, MTTP, MYO7A, NAGLU, NBAS, NDP, NEK2, NEUROD1, NMNAT1, NPHP1, NPHP3, NPHP4, NR2E3, NR2F1, NRL, NYX, OAT, OCA2, OFD1, OPA1, OPA3, OPN1SW, OR2W3, OTX2, P3H2, PAX2, PAX6, PCARE, PCDH15, PCYT1A, PDE6A, PDE6B, PDE6C, PDE6D, PDE6G, PDE6H, PDZD7, PEX1, PEX10, PEX11B, PEX12, PEX13, PEX14, PEX16, PEX19, PEX2, PEX26, PEX3, PEX5, PEX6, PEX7, PHYH, PITPNM3, PLA2G5, PLK4, PNPLA6, POC1B, POC5, POMGNT1, PPT1, PRCD, PRDM13, PROM1, PRPF3, PRPF31, PRPF4, PRPF6, PRPF8, PRPH2, PRPS1, RAB28, RAX2, RBP1, RBP3, RBP4, RCBTB1, RD3, RDH11, RDH12, RDH5, REEP6, RGR, RGS9, RGS9BP, RHO, RIMS1, RLBP1, ROM1, RP1, RP1L1, RP2, RP9, RPE65, RPGR, RPGR (ORF15), RPGRIP1, RPGRIP1L, RS1, RTN4IP1, SAG, SAMD11, SCLT1, SDCCAG8, SEMA4A, SGSH, SIX6, SLC24A1, SLC24A5, SLC45A2, SLC7A14, SNRNP200, SPATA7, SPP2, |
|----------------------------------------------------------------------------------------------------------------------------------------------------------------------------------------------------------------------------------------------------------------------------------------------------------------------------------------------------------------------------------------------------------------------------------------------------------------------------------------------------------------------------------------------------------------------------------------------------------------------------------------------------------------------------------------------------------------------------------------------------------------------------------------------------------------------------------------------------------------------------------------------------------------------------------------------------|--------------------------------------------------------------------------------------------------------------------------------------------------------------------------------------------------------------------------------------------------------------------------------------------------------------------------------------------------------------------------------------------------------------------------------------------------------------------------------------------------------------------------------------------------------------------------------------------------------------------------------------------------------------------------------------------------------------------------------------------------------------------------------------------------------------------------------------------------------------------------------------------------------------------------------------------------------------------------------------------------------------------------------------------------------------------------------------------------------------------------|

|                                                                                                                                                                                                                                                                                                                                                                                                                                                                                                                                                                                                                                                                                                     |                                                                                                                                                                                                                                                                                                                                                                          |
|-----------------------------------------------------------------------------------------------------------------------------------------------------------------------------------------------------------------------------------------------------------------------------------------------------------------------------------------------------------------------------------------------------------------------------------------------------------------------------------------------------------------------------------------------------------------------------------------------------------------------------------------------------------------------------------------------------|--------------------------------------------------------------------------------------------------------------------------------------------------------------------------------------------------------------------------------------------------------------------------------------------------------------------------------------------------------------------------|
| RDH5, REEP6, RGR, RGS9, RGS9BP,<br>RHO, RIMS1, RLBP1, ROM1, RP1, RP1L1,<br>RP2, RP9, RPE65, RPGR, RPGRIP1,<br>RPGRIP1L, RS1, RTN4IP1, SAG, SCAPER,<br>SCLT1, SDCCAG8, SEMA4A, SIX6,<br>SLC24A1, SLC30A7, SLC39A12, SLC66A1,<br>SLC6A6, SLC7A14, SNRNP200, SPATA7,<br>SSBP1, STX3, SUFU, TCTN1, TCTN2,<br>TCTN3, TEAD1, TIMM8A, TIMP3,<br>TLCD3B, TMEM107, TMEM126A,<br>TMEM138, TMEM216, TMEM218,<br>TMEM231, TMEM237, TMEM67,<br>TOGARAM1, TOPORS, TPP1, TRAPPC3,<br>TRIM32, TRPM1, TSPAN12, TTC21B,<br>TTC8, TTLL5, TUB, TUBB4B, TUBGCP4,<br>TUBGCP6, TULP1, TXNDC15, TYR,<br>UNC119, USH1C, USH1G, USH2A, USO1,<br>USP45, VPS13B, WDPCP, WDR19, WFS1,<br>WHRN, YME1L1, ZNF408, ZNF423,<br>ZNF513 | TCTN1, TCTN2, TCTN3, TEAD1, TIMM8A, TIMP3,<br>TMED7, TMEM107, TMEM126A, TMEM138,<br>TMEM216, TMEM231, TMEM237, TMEM67,<br>TOPORS, TRAF3IP1, TREX1, TRIM32, TRNT1,<br>TRPM1, TSPAN12, TTC21B, TTC8, TTLL5, TTPA,<br>TUB, TUBGCP4, TUBGCP6, TULP1, TYR, TYRP1,<br>UNC119, USH1C, USH1G, USH2A, VCAN, VPS13B,<br>WDPCP, WDR19, WDR34, WFS1, WHRN, ZNF408,<br>ZNF423, ZNF513 |
|-----------------------------------------------------------------------------------------------------------------------------------------------------------------------------------------------------------------------------------------------------------------------------------------------------------------------------------------------------------------------------------------------------------------------------------------------------------------------------------------------------------------------------------------------------------------------------------------------------------------------------------------------------------------------------------------------------|--------------------------------------------------------------------------------------------------------------------------------------------------------------------------------------------------------------------------------------------------------------------------------------------------------------------------------------------------------------------------|
